# Supplementary material for: Dairy and Plant-Based Milks: Implications for Nutrition and Planetary Health
Source: Curr Environ Health Rep. 2023 Jun 10;10(3):291–302. doi: 10.1007/s40572-023-00400-z (PMC10504201; doi:10.1007/s40572-023-00400-z)
Supplement: Supplementary file 2 — Supplementary file2 (XLSX 69 KB) [file 40572_2023_400_MOESM2_ESM.xlsx]

## Sheet: Table of contents
Table of contents
Table S1 Annual U.S. milk sales in dollars
Table S2 Annual U.S. milk sales in units sold
Table S3 Concentrations of selected nutrients per 240 mL of dairy and plant-based milks
Table S4 Summary of cited environmental impact studies
Table S5 Global warming potential (GWP) associated with dairy and plant milks
Table S6 Global warming potential (GWP) associated with dairy and plant milks, averaged by study and milk type
Table S7 Global warming potential (GWP) associated with dairy and plant milks, medians by milk type
Table S8 Water use associated with dairy and plant milks
Table S9 Water use associated with dairy and plant milks, averaged by study, milk type, water use type, and use of scarcity weighting

## Sheet: Table S1
Table S1 Annual U.S. milk sales in dollars
Source: Nielsen (eXtended All Outlet Combined, xAOC, product, New York, NY)
	Sales (millions USD)
product	2017	2018	2019	2017-2019 avg
dairy milk products (total)	25503.6	24503.8	24592.2	24866.5
cow's milk	22494.9	21272.4	21111.3	21626.2
lactose reduced/free milk	2084.47	2288.31	2519.49	2297.43
egg nog	350	362	358	357
buttermilk	294	283	285	287
remaining milk products	281	298	318	299
plant-based milks (total)	2093.2	2230.45	2339.31	2220.99
almond milk	1134.77	1273.71	1345.24	1251.24
soy milk	479	436	380	432
coconut milk	202	198	188	195
oat milk	9.3	17.4	136	54.3
rice milk	84.4	81.9	74.8	80.4
remaining milk alternatives	184	223	215	207

## Sheet: Table S2
Table S2 Annual U.S. milk sales in units sold
Source: Nielsen (eXtended All Outlet Combined, xAOC, product, New York, NY)
	Sales (millions of units sold)
product	2017	2018	2019	2017-2019 avg
dairy milk products (total)	27165.8	26713.8	25850.2	26576.6
cow's milk	25750.7	25209	24242.3	25067.3
lactose reduced/free milk	1049.58	1138.03	1245.57	1100
egg nog	137	141	135	138
buttermilk	174	168	166	169
remaining milk products	54.6	57.6	61.3	57.8
plant-based milks (total)	1978.31	2161.09	2277.83	2139.1
almond milk	1416.98	1611.29	1731.41	1586.6
soy milk	293	267	235	265
coconut milk	106	102	93	100
oat milk	2.7	5.6	58.7	22.3
rice milk	44.5	43.4	37.7	41.8
remaining milk alternatives	116	132	123	123

## Sheet: Table S3
Table S3 Concentrations of selected nutrients per 240 mL of dairy and plant-based milks
Source: FoodData Central, U.S. Department of Agiculture. Available at: https://fdc.nal.usda.gov/fdc-app.html#/
milk type	source	FDC ID	description	brand	calories (kcal)	protein (g)	calcium (mg)	magnesium (mg)	phosphorus (mg)	potassium (mg)	selenium (mcg)	zinc (mg)	choline (mg)	riboflavin (mg)	B12 (ug)	vit D (mcg)	vit E (mg)
Dairy milk	FoodData Central, FNDDS	1097512	Milk, whole	n/a	146	8	300	29.3	246	366	4.64	1	43.4	0.337	1.32	2.68	0.122
Dairy milk	FoodData Central, FNDDS	1097517	Milk, reduced fat (2%)	n/a	122	8.17	307	29.3	251	388	4.39	1.05	44.4	0.334	1.34	2.68	0.073
Dairy milk	FoodData Central, FNDDS	1097521	Milk, fat free (skim)	n/a	83	8.37	322	29.3	261	407	4.88	1.1	44.4	0.32	1.42	2.68	0
Dairy milk	FoodData Central, FNDDS	2340764	Milk, low fat (1%)	n/a	105	8.25	307	29.3	251	388	5.12	1.05	42.5	0.342	1.49	2.68	0.049
Dairy milk, lactose free	FoodData Central, FNDDS	1097522	Milk, lactose free, low fat (1%)	n/a	105	8.25	307	29.3	251	388	5.12	1.05	42.5	0.342	1.49	2.68	0.049
Dairy milk, lactose free	FoodData Central, FNDDS	1097523	Milk, lactose free, fat free (skim)	n/a	83	8.37	322	29.3	261	407	4.88	1.1	44.4	0.32	1.42	2.68	0
Dairy milk, lactose free	FoodData Central, FNDDS	1097524	Milk, lactose free, reduced fat (2%)	n/a	122	8.17	307	29.3	251	388	4.39	1.05	44.4	0.334	1.34	2.68	0.073
Dairy milk, lactose free	FoodData Central, FNDDS	1097525	Milk, lactose free, whole	n/a	146	8	300	29.3	246	366	4.64	1	43.4	0.337	1.32	2.68	0.122
Almond milk	FoodData Central, FNDDS	1097550	Almond milk, unsweetened	n/a	36.6	0.976	449	14.6	22	163	0.244	0.146	7.56	0.024	0	2.44	6.86
Cashew milk	FoodData Central, Branded Foods	1938185	CASHEW NON-DAIRY BEVERAGE, UNSWEETENED, ORIGINAL	Pacific foods	50.4	1.008	48			50.4						0
Cashew milk	FoodData Central, Branded Foods	1963836	UNSWEETENED MILKED CASHEWS, UNSWEETENED	Elmhurst	129.6	4.008	14.4			144						0
Cashew milk	FoodData Central, Branded Foods	1981497	UNSWEETENED ORGANIC DAIRY-FREE CASHEWMILK, UNSWEETENED	Forager Project	50.4	1.008	26.4			52.8						0
Cashew milk	FoodData Central, Branded Foods	2176365	UNSWEETENED CASHEW PLANT BASED BEVERAGE, UNSWEETENED CASHEW	Plant Folk	40.8	1.008	376.8			28.8
Coconut milk	FoodData Central, FNDDS	1097553	Coconut milk	n/a	75.6	0.512	459	0	0	46.4	0	0	0	0	1.54	2.44	0
Hemp milk	FoodData Central, Branded Foods	1896833	ORGANIC FLAX HEMP MILK, UNSWEETENED	Go Beyond	45.6	1.992	28.8
Hemp milk	FoodData Central, Branded Foods	1908151	ORIGINAL UNSWEETENED HEMP NON-DAIRY BEVERAGE, ORIGINAL	Pacific Foods	60	3	283.2	67.2		100.8
Hemp milk	FoodData Central, Branded Foods	1909916	HEMPMILK, UNSWEETENED ORIGINAL	Living Harvest	79.2	1.992	300	40.8	199.2			0.6		0.4248	1.488	2.52
Oat milk	FoodData Central, Branded Foods	719016	THE ORIGINAL OAT-MILK	OATLY!	120	3	350.4		268.8	388.8				0.6	1.2
Oat milk	FoodData Central, Branded Foods	1900436	OAT NON-DAIRY BEVERAGE, ORIGINAL	Pacific Foods of Oregon, Inc.	129.6	4.008	350.4			120				0.5088		2.52
Oat milk	FoodData Central, Branded Foods	1963352	ORIGINAL OAT BEVERAGE, ORIGINAL	The Hain Celestial Group, Inc.	120	1.992	300		100.8	69.6					0.6
Oat milk	FoodData Central, Branded Foods	1963353	UNSWEETENED OAT BEVERAGE	The Hain Celestial Group, Inc.	69.6	1.008	300		40.8	40.8					0.6
Oat milk	FoodData Central, Branded Foods	1987866	BARISTA ORGANIC OAT DRINK, BARISTA	BetterBody Foods & Nutrition, LLC	180	1.992				100.8
Oat milk	FoodData Central, Branded Foods	1999352	ORIGINAL MILD, CREAMY ORGANIC OAT PLANT-BASED BEVERAGE, ORIGINAL	Pacific Foods of Oregon, Inc.	129.6	4.008	120			100.8
Oat milk	FoodData Central, Branded Foods	2083820	ORGANIC ORIGINAL OAT PLANT-BASED BEVERAGE, ORIGINAL	Pacific Foods of Oregon, Inc.	129.6	4.008	120			132
Oat milk	FoodData Central, Branded Foods	2141004	ORIGINAL UNSWEETENED OAT BRAN BEVERAGE, ORIGINAL UNSWEETENED	The Quaker Oats Company	28.8	1.008	300									2.52
Oat milk	FoodData Central, Branded Foods	2155075	ORIGINAL PLANT BASED OAT NON-DAIRY OAT BEVERAGE, ORIGINAL	Glencourt Inc.	100.8	1.992	309.6		120	360		1.008		0.3696	0.984
Oat milk	FoodData Central, Branded Foods	2161259	ORIGINAL OAT NON-DAIRY BEVERAGE, ORIGINAL	Topco Associates, Inc.	120	3	350.4			388.8				0.6	1.2
Oat milk	FoodData Central, Branded Foods	2161723	ORIGINAL OATMILK NON-DAIRY OAT BEVERAGE, ORIGINAL	The Kroger Co.	120	3	350.4		268.8	388.8				0.6	1.2
Oat milk	FoodData Central, Branded Foods	2214073	ORIGINAL ORGANIC OAT MILK, ORIGINAL	MALK	91.2	3	9.6			110.4
Oat milk	FoodData Central, Branded Foods	1981847	UNSWEETENED MILKED OATS, UNSWEETENED	Steuben Foods Inc.	79.2	4.008	19.2			93.6
Oat milk	FoodData Central, Branded Foods	1989301	THE ORIGINAL OAT- MILK, ORIGINAL	Oatly, Inc.	124.8	2.904	254.4		218.4	254.4				0.7416	3.48	1.8
Oat milk	FoodData Central, Branded Foods	1991008	ORIGINAL PLANT-BASED OAT MILK, ORIGINAL	Ahold USA, Inc.	129.6	1.992	290.4			100.8				0.4992	0.912
Oat milk	FoodData Central, Branded Foods	2182620	ORIGINAL PLANT-BASED ORGANIC OAT DRINK, ORIGINAL	BetterBody Foods & Nutrition, LLC	129.6	1.992	288			103.2				0.4992	0.912
Pea milk	FoodData Central, Branded Foods	1947598	UNSWEETENED PLANT MILK PROTEIN	Bolthouse Farms	91.2	10.008	451.2			331.2					2.688		4.8
Pea milk	FoodData Central, Branded Foods	2168265	2% REDUCED FAT NOTMILK PLANT-BASED MILK ALTERNATIVE	NOTCO	79.2	4.008	314.4			573.6					0.792
Pea milk	FoodData Central, Branded Foods	2247119	ORGANIC PLANT PROTEIN MILK, UNSWEETENED	Suja	60	7.992	300									1.98
Pea milk	FoodData Central, Branded Foods	2287768	RIPPLE, UNSWEETENED NUTRITIOUS PLANT-BASED MILK, ORIGINAL, ORIGINAL	Ripple	74.4	8.112	472.8	0		357.6						3.06
Rice milk	FoodData Central, FNDDS	1097552	Rice milk	n/a	115	0.683	288	26.8	137	65.9	5.37	0.317	5.12	0.346	1.54	2.44	1.15
Soy milk	FoodData Central, FNDDS	1097542	Soy milk	n/a	105	6.34	300	36.6	105	298	5.61	0.634	57.6	0.449	2.07	2.68	0.268
Soy milk	FoodData Central, FNDDS	1097543	Soy milk, light	n/a	73.2	5.81	300	36.6	212	285	5.61	0.561	30	0.49	2.44	2.93	0.146
Soy milk	FoodData Central, FNDDS	1097544	Nonfat soy milk	n/a	68.3	6.03	283	24.4	212	256	4.39	0.244	43.7	0.425	0.561	2.44	0.195

## Sheet: Table S4
Table S4 Summary of cited environmental impact studies
Includes primary sources (1st column) and secondary sources, where applicable, identified via our search methodology (last column).
	milk_types_reported								impacts_reported
study	cow	almond	coconut	oat	pea	rice	soy	spelt	gwp	water_use	published_in_peer_review_journal	study_details	cited_in
Birgersson et al. (2009)	yes						yes		yes		no	Birgersson, S.,Karlsson, B.S., and Soderlund, L. (2009). Soy Milk— An Attributional Assessment Examining the Potential Environmental Impact of Soy Milk. Stockholm University, Stockholm. Available at: https://www.scribd.com/document/366568700/Soy-milk-an-attributional-Life-Cycle-Assessment-examining-the-potential-environmental-impact-of-soy-milk-pdf (accessed 26 March 2021)	Reported in Grant, C. A., & Hicks, A. L. (2018). Comparative life cycle assessment of milk and plant-based alternatives. Environmental Engineering Science, 35(11), 1235-1247.
Blonk et al. (2008)	yes						yes		yes		no	Blonk, H., Kool, A., Luske, B. & Waart, S. D. (2008). Environmental effects of protein-rich products in the Netherlands: consequences of animal protein substitutes: Blonk Consultants.	Reported in Heller, M. C., Willits-Smith, A., Meyer, R., Keoleian, G. A., & Rose, D. (2018). Greenhouse gas emissions and energy use associated with production of individual self-selected US diets. Environmental Research Letters, 13(4), 044004.
Buchan et al. (2022)	yes	yes	yes	yes	yes				yes	yes	no	Buchan, L., Henderson, A., & Unnasch, S. (2022). Ripple Milk Life Cycle Assessment. Life Cycle Associates. Available at: https://www.ripplefoods.com/pdf/Ripple_LCA_Report_v6.pdf (accessed 13 October 2022)	Original study from 2017 by Henderson & Unnasch was reported in Winans, K. S., Macadam-Somer, I., Kendall, A., Geyer, R., & Marvinney, E. (2020). Life cycle assessment of California unsweetened almond milk. The International Journal of Life Cycle Assessment, 25(3), 577-587. A newer version of the report from 2022 superceded the 2017 report and was used in its place.
Chapa et al. (2020)	yes						yes		yes		yes	Chapa, J., Farkas, B., Bailey, R. L., & Huang, J. Y. (2020). Evaluation of environmental performance of dietary patterns in the United States considering food nutrition and satiety. Science of The Total Environment, 722, 137672.
Ercin et al. (2012)	yes						yes			yes	yes	Ercin, E., Aldaya, M., & Hoekstra, A. (2012). The water footprint of soy milk and soy burger and equivalent animal products. Ecoligical Indicators, 18, 392-402.
Feraldi et al. (2012)		yes	yes				yes		yes	yes	no	Feraldi, R., Huff, M., Molen, A.M., and New, H. (2012). Life Cycle Assessment of Coconut Milk and Two Non-Dairy Milk Beverage Alternatives. LCA XII. Tacoma, American Center for Life Cycle Assessment 23. Retrieved from author via personal communication.	Reported in Clune, S., Crossin, E., Verghese, K. (2017). Systematic review of greenhouse gas emissions for different fresh food categories. Journal of Cleaner Production 140: 766–783.
Florén et al. (2013)	yes			yes					yes	yes	no	Florén, B., Nilsson, K., Wallman, M. (2013). LCA on fresh and aseptic oat drink. Swedish Institute for Food and Biotechnology. https://www.zaailingen.com/wp-content/bestanden/oatly.pdf.	Reported in Winans, K. S., Macadam-Somer, I., Kendall, A., Geyer, R., & Marvinney, E. (2020). Life cycle assessment of California unsweetened almond milk. The International Journal of Life Cycle Assessment, 25(3), 577-587.
Geburt et al. (2022)	yes	yes		yes			yes		yes	yes	yes	Geburt, K., Albrecht, E. H., Pointke, M., Pawelzik, E., Gerken, M., & Traulsen, I. (2022). A Comparative Analysis of Plant-Based Milk Alternatives Part 2: Environmental Impacts. Sustainability, 14(14), 8424.
Granarolo (2016)							yes		yes		no	Granarolo (subsidiary of Granlatte Societa Cooperativa Agricola) (2016). Dichiarazione ambientale di prodotto della bevanda UHT di soia Granarolo 100% vegetale. Granarolo Group, Bologna. https://portal.environdec.com/api/api/v1/EPDLibrary/Files/cb56780d-4dca-49f8-b95e-a02a7349025d/Data. Accessed 26 March 2021.	Reported in Winans, K. S., Macadam-Somer, I., Kendall, A., Geyer, R., & Marvinney, E. (2020). Life cycle assessment of California unsweetened almond milk. The International Journal of Life Cycle Assessment, 25(3), 577-587.
Grant & Hicks (2018)	yes	yes					yes		yes	yes*	yes	Grant, C. A., & Hicks, A. L. (2018). Comparative life cycle assessment of milk and plant-based alternatives. Environmental Engineering Science, 35(11), 1235-1247.
Head et al. (2011)	yes						yes		yes		no	Head, M., Sevenster, M. & Croezen, H. (2011). Life Cycle Impacts of Protein- rich Foods for Superwijzer. Delft, Netherlands, 1-70.	Reported in Heller, M. C., Willits-Smith, A., Meyer, R., Keoleian, G. A., & Rose, D. (2018). Greenhouse gas emissions and energy use associated with production of individual self-selected US diets. Environmental Research Letters, 13(4), 044004.
Poore & Nemecek (2018)	yes	yes		yes		yes	yes		yes	yes	yes**	Poore, J., & Nemecek, T. (2018). Reducing food’s environmental impacts through producers and consumers. Science, 360(6392), 987-992.
Reinhardt et al. (2020)	yes	yes		yes			yes	yes	yes	yes	no	Reinhardt, G., Gärtner, S., & Wagner, T. (2020). Environmental footprints of food products and dishes in Germany. Heidelberg. Retrieved from https://www.ifeu.de/fileadmin/uploads/Reinhardt-Gaertner-Wagner-2020-Environmental-footprints-of-food-products-and-dishes-in-Germany-ifeu-2020.pdf	Estimates from 2016 reported in Kolbe, K. (2020). Mitigating climate change through diet choice: Costs and CO2 emissions of different cookery book-based dietary options in Germany. Advances in Climate Change Research, 11(4), 392-400. Updated PDF found through online searches is from 2020.
Smedman et al. (2010)	yes			yes			yes		yes		yes***	Smedman, A., Lindmark-Månsson, H., Drewnowski, A., & Edman, A. K. M. (2010). Nutrient density of beverages in relation to climate impact. Food & nutrition research, 54(1), 5170.
Tesco (2012)	yes						yes		yes		no	Tesco (2012). "Product carbon footprint summary." Available at https://issuu.com/thema1/docs/tesco_product_carbon_footprint_summary_1_ (retrieved 26 March 2021).	Reported in Clune, S., Crossin, E., Verghese, K. (2017). Systematic review of greenhouse gas emissions for different fresh food categories. Journal of Cleaner Production 140: 766–783.
Winans et al. (2020)		yes							yes	yes	yes	Winans, K. S., Macadam-Somer, I., Kendall, A., Geyer, R., & Marvinney, E. (2020). Life cycle assessment of California unsweetened almond milk. The International Journal of Life Cycle Assessment, 25(3), 577-587.
*Grant & Hicks (2018) report water use, but the type of water use (e.g., water consumption v. withdrawals) is not indicated and the authors were unable to clarify this upon contacting them, thus we did not include their water use results in our review.
**Poore & Nemecek (2018) is published in a peer-reviewed journal but our review includes some unpublished data provided by the authors via personal communication.
***Smedman et al. (2010) is published in a peer-review journal but their life cycle assesment results are from reports.

## Sheet: Table S5
Table S5 Global warming potential (GWP) associated with dairy and plant milks
In some cases, to make values comparable, we adapted values as reported in the studies to standardized units. We also adapted GWP estimates to span farm to processor gate, including packaging, wherever possible.
Unless otherwise indicated, if the scope extended beyond the processor gate, packaging was included. Emissions from packaging may or may not have included small contributions from the end-of-life stage.
study	milk_type	milk_type_note	gwp_as_reported	unit_as_reported	scope_as_reported	gwp_standardized	unit_standardized	scope_standardized	gwp_time_horizon	note
Birgersson et al. (2009)	cow		900	g CO2e/L milk	Cradle to farm gate	0.9	kg CO2e/L milk	Cradle to farm gate	Not reported	Primary source: Cederberg, C. Flysjö , A. 2004. Life Cycle inventory of 23 dairy farms in South-Western Sweden. The Swedish Institute for food and biotechnology.
Birgersson et al. (2009)	soy		215	g CO2e/L milk	Cradle to packaging end of life	0.1634	kg CO2e/L milk	Cradle to processor gate, incl. packaging	Not reported
Blonk et al. (2008)	cow		1.22	kg CO2e/kg milk	Cradle to retail gate	1.13402	kg CO2e/L milk	Cradle to processor gate, incl. packaging	GWP 100	Used graph grabber to quantify results reported in a figure
Blonk et al. (2008)	soy		0.65	kg CO2e/kg milk	Cradle to retail gate	0.551546	kg CO2e/L milk	Cradle to processor gate, incl. packaging	GWP 100	Used graph grabber to quantify results reported in a figure
Buchan et al. (2022)	pea		299.8	g CO2e/L milk	Cradle to processor gate, incl. packaging	0.2998	kg CO2e/L milk		GWP 100
Buchan et al. (2022)	almond		259.8	g CO2e/L milk	Cradle to processor gate, incl. packaging	0.2598	kg CO2e/L milk		GWP 100
Buchan et al. (2022)	cow		1509.3	g CO2e/L milk	Cradle to processor gate, incl. packaging	1.5093	kg CO2e/L milk		GWP 100
Buchan et al. (2022)	oat		377.5	g CO2e/L milk	Cradle to processor gate, incl. packaging	0.3775	kg CO2e/L milk		GWP 100
Buchan et al. (2022)	coconut		298.8	g CO2e/L milk	Cradle to processor gate, incl. packaging	0.2988	kg CO2e/L milk		GWP 100
Chapa et al. (2020)	cow	Skim	1.12	kg CO2e/kg milk	Cradle to processor gate; packaging not specified	1.15464	kg CO2e/L milk	Cradle to processor gate; packaging not specified	Not reported
Chapa et al. (2020)	cow	Whole	0.91	kg CO2e/kg milk	Cradle to processor gate; packaging not specified	0.938144	kg CO2e/L milk	Cradle to processor gate; packaging not specified	Not reported
Chapa et al. (2020)	cow	2% milkfat	0.85	kg CO2e/kg milk	Cradle to processor gate; packaging not specified	0.876289	kg CO2e/L milk	Cradle to processor gate; packaging not specified	Not reported
Chapa et al. (2020)	cow	1% milkfat	0.81	kg CO2e/kg milk	Cradle to processor gate; packaging not specified	0.835052	kg CO2e/L milk	Cradle to processor gate; packaging not specified	Not reported
Chapa et al. (2020)	soy		0.29	kg CO2e/kg milk	Cradle to processor gate; packaging not specified	0.298969	kg CO2e/L milk	Cradle to processor gate; packaging not specified	Not reported
Feraldi et al (2012)	almond	Gable top carton	0.11	kg CO2e/0.5 gallon milk	Cradle to processor gate, excl. packaging	0.311723	kg CO2e/L milk	Cradle to processor gate, incl. packaging	GWP 100 (based on use of IPCC factors)	Adapted to include packaging GWP reported for coconut milk
Feraldi et al (2012)	almond	Tetra Brik Aseptic carton	0.11	kg CO2e/0.5 gallon milk	Cradle to processor gate, excl. packaging	0.264172	kg CO2e/L milk	Cradle to processor gate, incl. packaging	GWP 100 (based on use of IPCC factors)	Adapted to include packaging GWP reported for coconut milk
Feraldi et al (2012)	coconut	Gable top carton	0.58	kg CO2e/0.5 gallon milk	Cradle to processor gate, incl. packaging	0.30644	kg CO2e/L milk		GWP 100 (based on use of IPCC factors)	Scope is described as "cradle to grave" but retail and consumer stages do not appear to be included
Feraldi et al (2012)	coconut	Tetra Brik Aseptic carton	0.49	kg CO2e/0.5 gallon milk	Cradle to processor gate, incl. packaging	0.258889	kg CO2e/L milk		GWP 100 (based on use of IPCC factors)	Scope is described as "cradle to grave" but retail and consumer stages do not appear to be included
Feraldi et al (2012)	soy	Gable top carton	0.61	kg CO2e/0.5 gallon milk	Cradle to processor gate, excl. packaging	0.575895	kg CO2e/L milk	Cradle to processor gate, incl. packaging	GWP 100 (based on use of IPCC factors)	Adapted to include packaging GWP reported for coconut milk
Feraldi et al (2012)	soy	Tetra Brik Aseptic carton	0.61	kg CO2e/0.5 gallon milk	Cradle to processor gate, excl. packaging	0.528344	kg CO2e/L milk	Cradle to processor gate, incl. packaging	GWP 100 (based on use of IPCC factors)	Adapted to include packaging GWP reported for coconut milk
Florén et al. (2013)	cow	Semi-skimmed	1.3	kg CO2e/L milk	Cradle to consumer gate	1.23467	kg CO2e/L milk	Cradle to processor gate, incl. packaging	GWP 100 (based on Table 19)
Florén et al. (2013)	oat	Fresh oat drink	0.49	kg CO2e/L milk	Cradle to consumer gate	0.339634	kg CO2e/L milk	Cradle to processor gate, incl. packaging	GWP 100 (based on Table 19)
Florén et al. (2013)	oat	Aseptic carton	0.37	kg CO2e/L milk	Cradle to consumer gate	0.271372	kg CO2e/L milk	Cradle to processor gate, incl. packaging	GWP 100 (based on Table 19)
Geburt et al. (2022)	cow	Conventional, non-UHT	1.41	kg CO2e/kg milk	Cradle to retail gate	1.45361	kg CO2e/L milk		Not reported	Unable to disaggregate post-processor gate emissions
Geburt et al. (2022)	cow	Organic, non-UHT	1.45	kg CO2e/kg milk	Cradle to retail gate	1.49485	kg CO2e/L milk		Not reported	Unable to disaggregate post-processor gate emissions
Geburt et al. (2022)	cow	Conventional, UHT	1.3	kg CO2e/kg milk	Cradle to retail gate	1.34021	kg CO2e/L milk		Not reported	Unable to disaggregate post-processor gate emissions
Geburt et al. (2022)	cow	Organic, UHT	1.33	kg CO2e/kg milk	Cradle to retail gate	1.37113	kg CO2e/L milk		Not reported	Unable to disaggregate post-processor gate emissions
Geburt et al. (2022)	almond		0.61	kg CO2e/kg milk	Cradle to retail gate	0.628866	kg CO2e/L milk		Not reported	Unable to disaggregate post-processor gate emissions
Geburt et al. (2022)	oat		0.46	kg CO2e/kg milk	Cradle to retail gate	0.474227	kg CO2e/L milk		Not reported	Unable to disaggregate post-processor gate emissions
Geburt et al. (2022)	soy	Conventional (Brazil, USA)	0.46	kg CO2e/kg milk	Cradle to retail gate	0.474227	kg CO2e/L milk		Not reported	Unable to disaggregate post-processor gate emissions
Geburt et al. (2022)	soy	Organic (Switzerland)	0.4	kg CO2e/kg milk	Cradle to retail gate	0.412371	kg CO2e/L milk		Not reported	Unable to disaggregate post-processor gate emissions
Granarolo (2016)	soy	Organic	0.96	kg CO2e/L milk	Cradle to retail	0.86	kg CO2e/L milk	Cradle to processor gate, incl. packaging	GWP 100 (based on use of IPCC factors)
Grant & Hicks (2018)	cow		2.6602	kg CO2e/L milk	Cradle to retail gate	1.5767	kg CO2e/L milk	Cradle to processor gate, incl. packaging	Not reported
Grant & Hicks (2018)	almond		2.6768	kg CO2e/L milk	Cradle to retail gate	0.2181	kg CO2e/L milk	Cradle to processor gate, incl. packaging	Not reported
Grant & Hicks (2018)	soy		3.4671	kg CO2e/L milk	Cradle to retail gate	0.2167	kg CO2e/L milk	Cradle to processor gate, incl. packaging	Not reported
Head et al. (2011)	cow	Full cream	1.31	kg CO2e/kg milk	Cradle to retail gate, excl. packaging	1.35052	kg CO2e/L milk		Not reported	Unable to disaggregate post-processor gate emissions
Head et al. (2011)	cow	Semi-skim	1.21	kg CO2e/kg milk	Cradle to retail gate, excl. packaging	1.24742	kg CO2e/L milk		Not reported	Unable to disaggregate post-processor gate emissions
Head et al. (2011)	cow	Skim	1.01	kg CO2e/kg milk	Cradle to retail gate, excl. packaging	1.04124	kg CO2e/L milk		Not reported	Unable to disaggregate post-processor gate emissions
Head et al. (2011)	soy	Uncertified	0.89	kg CO2e/kg milk	Cradle to retail gate, excl. packaging	0.917526	kg CO2e/L milk		Not reported	Unable to disaggregate post-processor gate emissions; "certified" refers to "soy from countries based on average import figures and that is certified and has thus not been grown on transformed land with high biodiversity, or soy from North America or Europe."
Head et al. (2011)	soy	Certified	0.61	kg CO2e/kg milk	Cradle to retail gate, excl. packaging	0.628866	kg CO2e/L milk		Not reported	Unable to disaggregate post-processor gate emissions; "certified" refers to "soy from countries based on average import figures and that is certified and has thus not been grown on transformed land with high biodiversity, or soy from North America or Europe."
Head et al. (2011)	soy	Certified organic	0.72	kg CO2e/kg milk	Cradle to retail gate, excl. packaging	0.742268	kg CO2e/L milk		Not reported	Unable to disaggregate post-processor gate emissions; "certified" refers to "soy from countries based on average import figures and that is certified and has thus not been grown on transformed land with high biodiversity, or soy from North America or Europe."
Head et al. (2011)	soy	Uncertified organic	0.72	kg CO2e/kg milk	Cradle to retail gate, excl. packaging	0.742268	kg CO2e/L milk		Not reported	Unable to disaggregate post-processor gate emissions; "certified" refers to "soy from countries based on average import figures and that is certified and has thus not been grown on transformed land with high biodiversity, or soy from North America or Europe."
Poore & Nemecek (2018)	cow	Global average	3.2	kg CO2e/L milk	Cradle to retail gate	2.7168	kg CO2e/L milk	Cradle to processor gate, incl. packaging	GWP 100	Post-processor-gate GWP was removed using Graph Grabber from Figure S13, pg. 60 of supplement; unable to disaggregate GWP from transportation
Poore & Nemecek (2018)	almond	Global average	0.7	kg CO2e/L milk	Cradle to retail gate				GWP 100	Provided by J. Poore (personal communication); unable to disaggregate post-processor gate emissions
Poore & Nemecek (2018)	soy	Global average	1	kg CO2e/L milk	Cradle to retail gate	0.681	kg CO2e/L milk	Cradle to processor gate, incl. packaging	GWP 100	Post-processor-gate GWP was removed using Graph Grabber from Figure S13, pg. 60 of supplement; unable to disaggregate GWP from transportation
Poore & Nemecek (2018)	oat	Global average	0.9	kg CO2e/L milk	Cradle to retail gate				GWP 100	Provided by J. Poore (personal communication); unable to disaggregate post-processor gate emissions
Poore & Nemecek (2018)	rice	Global average	1.2	kg CO2e/L milk	Cradle to retail gate				GWP 100	Provided by J. Poore (personal communication); unable to disaggregate post-processor gate emissions
Reinhardt et al. (2020)	cow	Organic whole milk	1.7	kg CO2e/kg milk	Cradle to retail gate	1.75258	kg CO2e/L milk		GWP 100	Unable to disaggregate post-processor gate emissions
Reinhardt et al. (2020)	cow	Low-fat	1.2	kg CO2e/kg milk	Cradle to retail gate	1.23711	kg CO2e/L milk		GWP 100	Unable to disaggregate post-processor gate emissions
Reinhardt et al. (2020)	cow	Whole milk	1.4	kg CO2e/kg milk	Cradle to retail gate	1.4433	kg CO2e/L milk		GWP 100	Unable to disaggregate post-processor gate emissions
Reinhardt et al. (2020)	cow	UHT low-fat	1.1	kg CO2e/kg milk	Cradle to retail gate	1.13402	kg CO2e/L milk		GWP 100	Unable to disaggregate post-processor gate emissions
Reinhardt et al. (2020)	cow	UHT whole milk	1.3	kg CO2e/kg milk	Cradle to retail gate	1.34021	kg CO2e/L milk		GWP 100	Unable to disaggregate post-processor gate emissions
Reinhardt et al. (2020)	almond		0.3	kg CO2e/kg milk	Cradle to retail gate	0.309278	kg CO2e/L milk		GWP 100	Unable to disaggregate post-processor gate emissions
Reinhardt et al. (2020)	oat		0.3	kg CO2e/kg milk	Cradle to retail gate	0.309278	kg CO2e/L milk		GWP 100	Unable to disaggregate post-processor gate emissions
Reinhardt et al. (2020)	soy		0.4	kg CO2e/kg milk	Cradle to retail gate	0.412371	kg CO2e/L milk		GWP 100	Unable to disaggregate post-processor gate emissions
Reinhardt et al. (2020)	spelt		0.3	kg CO2e/kg milk	Cradle to retail gate	0.309278	kg CO2e/L milk		GWP 100	Unable to disaggregate post-processor gate emissions
Smedman et al. (2010)	cow	Swedish milk production	99	g CO2e/100 g milk	Cradle to retail	1.02062	kg CO2e/L milk		GWP 100	Original source: LRF (Federation of Swedish Farmers) Stockholm, Sweden: Federation of Swedish Farmers; 2002. Food and environment – LCA of seven food products.
Smedman et al. (2010)	oat		21	g CO2e/100 g milk	Cradle to retail	0.216495	kg CO2e/L milk		GWP 100	Original source of data is unpublished thesis that is not available online: Dahllöv O, Gustafsson M. (2009). Masters Thesis at the Department of Technology and Society, Environmental and Energy System Studies. Lund, Sweden: Lund University, Department of Technology and Society, Environmental and Energy Systems Studies. Life cycle analysis of Oatly oat drink.
Smedman et al. (2010)	soy		27	g CO2e/100 g milk	Cradle to retail	0.278351	kg CO2e/L milk		GWP 100	Data in this row is only from one of the two studies cited by Smedman et al (other study already reported/reflected above: Birgersson et al); original source was not available online: Soya Alpro. Burton Latimer, UK: 2009. The Alpro sustainable development report 2009. Available from: http://www.naturalsoya.co.uk/download/ALPRO_SD%20report_FINAL.pdf [cited 14 June 2010] Ecofys. Alpro Ecofys CO2-em…
Tesco (2012)	cow	UHT skim milk, 500 mL	700	g CO2e/pint milk	Cradle to consumer	1.47936	kg CO2e/L milk		Not reported	Unable to disaggregate post-processor gate emissions
Tesco (2012)	cow	UHT skim milk, 1 L	700	g CO2e/pint milk	Cradle to consumer	1.47936	kg CO2e/L milk		Not reported	Unable to disaggregate post-processor gate emissions
Tesco (2012)	cow	UHT semi milk, 500 mL	750	g CO2e/pint milk	Cradle to consumer	1.58503	kg CO2e/L milk		Not reported	Unable to disaggregate post-processor gate emissions
Tesco (2012)	cow	UHT semi milk, 1 L	800	g CO2e/pint milk	Cradle to consumer	1.6907	kg CO2e/L milk		Not reported	Unable to disaggregate post-processor gate emissions
Tesco (2012)	cow	UHT whole milk, 1 L	900	g CO2e/pint milk	Cradle to consumer	1.90204	kg CO2e/L milk		Not reported	Unable to disaggregate post-processor gate emissions
Tesco (2012)	cow	UHT whole milk, 500 mL	900	g CO2e/pint milk	Cradle to consumer	1.90204	kg CO2e/L milk		Not reported	Unable to disaggregate post-processor gate emissions
Tesco (2012)	cow	Skimmed milk	700	g CO2e/pint milk	Cradle to consumer	1.47936	kg CO2e/L milk		Not reported	Unable to disaggregate post-processor gate emissions
Tesco (2012)	cow	Semi-skimmed milk	800	g CO2e/pint milk	Cradle to consumer	1.6907	kg CO2e/L milk		Not reported	Unable to disaggregate post-processor gate emissions
Tesco (2012)	cow	Whole milk	900	g CO2e/pint milk	Cradle to consumer	1.90204	kg CO2e/L milk		Not reported	Unable to disaggregate post-processor gate emissions
Tesco (2012)	soy	Fresh sweetened	0.8	kg CO2e/L milk	Cradle to consumer				Not reported	Unable to disaggregate post-processor gate emissions
Tesco (2012)	soy	Unsweetened	0.7	kg CO2e/L milk	Cradle to consumer				Not reported	Unable to disaggregate post-processor gate emissions
Tesco (2012)	soy	Calcium enriched	0.9	kg CO2e/L milk	Cradle to consumer				Not reported	Unable to disaggregate post-processor gate emissions
Tesco (2012)	soy	Value unsweetened	0.7	kg CO2e/L milk	Cradle to consumer				Not reported	Unable to disaggregate post-processor gate emissions
Tesco (2012)	soy	Organic unsweetened	1.2	kg CO2e/L milk	Cradle to consumer				Not reported	Unable to disaggregate post-processor gate emissions
Tesco (2012)	soy	Organic sweetened	1.4	kg CO2e/L milk	Cradle to consumer				Not reported	Unable to disaggregate post-processor gate emissions
Winans et al (2020)	almond	2017 estimate	0.711	kg CO2e/1.42 L	Cradle to processor gate, incl. packaging	0.500704	kg CO2e/L milk		GWP 100
Winans et al (2020)	almond	2016 estimate	0.724	kg CO2e/1.42 L	Cradle to processor gate, incl. packaging	0.509859	kg CO2e/L milk		GWP 100

## Sheet: Table S6
Table S6 Global warming potential (GWP) associated with dairy and plant milks, averaged by study and milk type
If a given study reported multiple values for the same milk type, here we averaged those values.
study	milk_type	scope	gwp_avg	unit
Birgersson et al. (2009)	cow	Cradle to farm gate	0.9	kg CO2e/L milk
Birgersson et al. (2009)	soy	Cradle to processor gate, incl. packaging	0.1634	kg CO2e/L milk
Blonk et al. (2008)	cow	Cradle to processor gate, incl. packaging	1.13402	kg CO2e/L milk
Blonk et al. (2008)	soy	Cradle to processor gate, incl. packaging	0.551546	kg CO2e/L milk
Buchan et al. (2022)	almond	Cradle to processor gate, incl. packaging	0.2598	kg CO2e/L milk
Buchan et al. (2022)	coconut	Cradle to processor gate, incl. packaging	0.2988	kg CO2e/L milk
Buchan et al. (2022)	cow	Cradle to processor gate, incl. packaging	1.5093	kg CO2e/L milk
Buchan et al. (2022)	oat	Cradle to processor gate, incl. packaging	0.3775	kg CO2e/L milk
Buchan et al. (2022)	pea	Cradle to processor gate, incl. packaging	0.2998	kg CO2e/L milk
Chapa et al. (2020)	cow	Cradle to processor gate; packaging not specified	0.951031	kg CO2e/L milk
Chapa et al. (2020)	soy	Cradle to processor gate; packaging not specified	0.298969	kg CO2e/L milk
Feraldi et al (2012)	almond	Cradle to processor gate, incl. packaging	0.287948	kg CO2e/L milk
Feraldi et al (2012)	coconut	Cradle to processor gate, incl. packaging	0.282664	kg CO2e/L milk
Feraldi et al (2012)	soy	Cradle to processor gate, incl. packaging	0.55212	kg CO2e/L milk
Florén et al. (2013)	cow	Cradle to processor gate, incl. packaging	1.23467	kg CO2e/L milk
Florén et al. (2013)	oat	Cradle to processor gate, incl. packaging	0.305503	kg CO2e/L milk
Geburt et al. (2022)	almond	Cradle to retail gate	0.628866	kg CO2e/L milk
Geburt et al. (2022)	cow	Cradle to retail gate	1.41495	kg CO2e/L milk
Geburt et al. (2022)	oat	Cradle to retail gate	0.474227	kg CO2e/L milk
Geburt et al. (2022)	soy	Cradle to retail gate	0.443299	kg CO2e/L milk
Granarolo (2016)	soy	Cradle to processor gate, incl. packaging	0.86	kg CO2e/L milk
Grant & Hicks (2018)	almond	Cradle to processor gate, incl. packaging	0.2181	kg CO2e/L milk
Grant & Hicks (2018)	cow	Cradle to processor gate, incl. packaging	1.5767	kg CO2e/L milk
Grant & Hicks (2018)	soy	Cradle to processor gate, incl. packaging	0.2167	kg CO2e/L milk
Head et al. (2011)	cow	Cradle to retail gate, excl. packaging	1.21306	kg CO2e/L milk
Head et al. (2011)	soy	Cradle to retail gate, excl. packaging	0.757732	kg CO2e/L milk
Poore & Nemecek (2018)	almond	Cradle to retail gate	0.7	kg CO2e/L milk
Poore & Nemecek (2018)	cow	Cradle to processor gate, incl. packaging	2.7168	kg CO2e/L milk
Poore & Nemecek (2018)	oat	Cradle to retail gate	0.9	kg CO2e/L milk
Poore & Nemecek (2018)	rice	Cradle to retail gate	1.2	kg CO2e/L milk
Poore & Nemecek (2018)	soy	Cradle to processor gate, incl. packaging	0.681	kg CO2e/L milk
Reinhardt et al. (2020)	almond	Cradle to retail gate	0.309278	kg CO2e/L milk
Reinhardt et al. (2020)	cow	Cradle to retail gate	1.38144	kg CO2e/L milk
Reinhardt et al. (2020)	oat	Cradle to retail gate	0.309278	kg CO2e/L milk
Reinhardt et al. (2020)	soy	Cradle to retail gate	0.412371	kg CO2e/L milk
Reinhardt et al. (2020)	spelt	Cradle to retail gate	0.309278	kg CO2e/L milk
Smedman et al. (2010)	cow	Cradle to retail	1.02062	kg CO2e/L milk
Smedman et al. (2010)	oat	Cradle to retail	0.216495	kg CO2e/L milk
Smedman et al. (2010)	soy	Cradle to retail	0.278351	kg CO2e/L milk
Tesco (2012)	cow	Cradle to consumer	1.67896	kg CO2e/L milk
Tesco (2012)	soy	Cradle to consumer	0.95	kg CO2e/L milk
Winans et al (2020)	almond	Cradle to processor gate, incl. packaging	0.505282	kg CO2e/L milk

## Sheet: Table S7
Table S7 Global warming potential (GWP) associated with dairy and plant milks, medians by milk type
Medians of values reported in Table S3.
milk_type	median_gwp	unit
cow	1.30806	kg CO2e/L milk
rice	1.2	kg CO2e/L milk
soy	0.497423	kg CO2e/L milk
oat	0.343389	kg CO2e/L milk
almond	0.309278	kg CO2e/L milk
spelt	0.309278	kg CO2e/L milk
pea	0.2998	kg CO2e/L milk
coconut	0.290732	kg CO2e/L milk

## Sheet: Table S8
Table S8 Water use associated with dairy and plant milks
In some cases, to make values comparable, we adapted values as reported in the studies to standardized units.
Unless otherwise indicated, if the scope extended beyond the processor gate, packaging was included. Water use from packaging may or may not have included small contributions from the end-of-life stage.
study	milk_type	milk_type_note	water_use_type	scarcity_weighted	water_use_as_reported	unit_as_reported	water_use_standardized	unit_standardized	scope	note
Buchan et al. (2022)	almond		Total WF	yes	45376.9	L water/L milk			Cradle to processor gate, excl. packaging
Buchan et al. (2022)	coconut		Total WF	yes	366.94	L water/L milk			Cradle to processor gate, excl. packaging
Buchan et al. (2022)	cow		Total WF	yes	41728.8	L water/L milk			Cradle to processor gate, excl. packaging
Buchan et al. (2022)	oat		Total WF	yes	7988.79	L water/L milk			Cradle to processor gate, excl. packaging
Buchan et al. (2022)	pea		Total WF	yes	5935.76	L water/L milk			Cradle to processor gate, excl. packaging
Buchan et al. (2022)	almond		Total WF, protein basis	yes	8205443	L water/L milk			Cradle to processor gate, excl. packaging
Buchan et al. (2022)	coconut		Total WF, protein basis	yes	55991	L water/L milk			Cradle to processor gate, excl. packaging
Buchan et al. (2022)	cow		Total WF, protein basis	yes	1234579	L water/L milk			Cradle to processor gate, excl. packaging
Buchan et al. (2022)	oat		Total WF, protein basis	yes	609103	L water/L milk			Cradle to processor gate, excl. packaging
Buchan et al. (2022)	pea		Total WF, protein basis	yes	73016	L water/L milk			Cradle to processor gate, excl. packaging
Ercin et al (2012)	cow	Weighted global average	Blue WF	no	86	m^3 water/mt milk	88.6598	L water/L milk	Cradle to processor gate, incl. packaging	Cow milk estimate from Mekonnen and Hoekstra (2010), Table 4, added for comparative purposes; based on Ercin et al. (2012), Table 5, the water footprint of packaging is exclusively green and/or grey water, thus we assume packaging would not affect the blue water estimate of cow milk
Ercin et al (2012)	soy		Blue WF	no	11	L water/L milk			Cradle to processor gate, incl. packaging
Ercin et al (2012)	cow	Weighted global average	Total WF	no	1050	L water/L milk			Cradle to processor gate, incl. packaging
Ercin et al (2012)	soy		Total WF	no	296.9	L water/L milk			Cradle to processor gate, incl. packaging
Feraldi et al (2012)	almond		Blue WF	no	126	L water/0.5 gal milk	66.5714	L water/L milk	Cradle to processor gate, excl. packaging	Water use is described as "water consumption," we interpreted this as blue water footprint
Feraldi et al (2012)	coconut		Blue WF	no	6.81	L water/0.5 gal milk	3.59803	L water/L milk	Cradle to processor gate, excl. packaging	Water use is described as "water consumption," we interpreted this as blue water footprint
Feraldi et al (2012)	cow	Weighted global average	Blue WF	no	86	m^3 water/mt milk	88.6598	L water/L milk	Cradle to processor gate, excl. packaging	Cow milk estimate from Mekonnen and Hoekstra (2010), Table 4, added for comparative purposes
Feraldi et al (2012)	soy		Blue WF	no	50.8	L water/0.5 gal milk	26.8399	L water/L milk	Cradle to processor gate, excl. packaging	Water use is described as "water consumption," we interpreted this as blue water footprint
Florén et al. (2013), DEU	cow	Sweden, semi-skimmed	Blue WF	yes	0.0009	m3 water/L milk			Cradle to packaging end of life	This cow milk estimate is included twice so it can be compared to oat drink of both Swedish and German origin in Fig 4
Florén et al. (2013), DEU	oat	Fresh oat drink (Germany)	Blue WF	yes	0.008	m3 water/L milk			Cradle to packaging end of life
Florén et al. (2013), SWE	cow	Sweden, semi-skimmed	Blue WF	yes	0.0009	m3 water/L milk			Cradle to packaging end of life	This cow milk estimate is included twice so it can be compared to oat drink of both Swedish and German origin in Fig 4
Florén et al. (2013), SWE	oat	Aseptic oat drink (Sweden)	Blue WF	yes	0.00054	m3 water/L milk			Cradle to packaging end of life
Geburt et al. (2022)	almond		Blue WF	yes	0.14	m3 water/kg milk			Cradle to retail gate	Large water footprint values can be attributed in part to evaporative losses from hydroelectric energy generation.
Geburt et al. (2022)	almond		Blue WF	no	2.52	m3 water/kg milk			Cradle to retail gate	Large water footprint values can be attributed in part to evaporative losses from hydroelectric energy generation.
Geburt et al. (2022)	almond		Blue WF, protein basis	no	0.42	m3 water/g protein			Cradle to retail gate	Large water footprint values can be attributed in part to evaporative losses from hydroelectric energy generation.
Geburt et al. (2022)	cow	Conventional, non-UHT	Blue WF	yes	0.012	m3 water/kg milk			Cradle to retail gate	Large water footprint values can be attributed in part to evaporative losses from hydroelectric energy generation.
Geburt et al. (2022)	cow	Organic, non-UHT	Blue WF	yes	0.013	m3 water/kg milk			Cradle to retail gate	Large water footprint values can be attributed in part to evaporative losses from hydroelectric energy generation.
Geburt et al. (2022)	cow	Conventional, UHT	Blue WF	yes	0.01	m3 water/kg milk			Cradle to retail gate	Large water footprint values can be attributed in part to evaporative losses from hydroelectric energy generation.
Geburt et al. (2022)	cow	Organic, UHT	Blue WF	yes	0.01	m3 water/kg milk			Cradle to retail gate	Large water footprint values can be attributed in part to evaporative losses from hydroelectric energy generation.
Geburt et al. (2022)	cow	Conventional, non-UHT	Blue WF	no	7.37	m3 water/kg milk			Cradle to retail gate	Large water footprint values can be attributed in part to evaporative losses from hydroelectric energy generation.
Geburt et al. (2022)	cow	Organic, non-UHT	Blue WF	no	7.66	m3 water/kg milk			Cradle to retail gate	Large water footprint values can be attributed in part to evaporative losses from hydroelectric energy generation.
Geburt et al. (2022)	cow	Conventional, UHT	Blue WF	no	4.85	m3 water/kg milk			Cradle to retail gate	Large water footprint values can be attributed in part to evaporative losses from hydroelectric energy generation.
Geburt et al. (2022)	cow	Organic, UHT	Blue WF	no	5.14	m3 water/kg milk			Cradle to retail gate	Large water footprint values can be attributed in part to evaporative losses from hydroelectric energy generation.
Geburt et al. (2022)	cow	Conventional, non-UHT	Blue WF, protein basis	no	0.22	m3 water/g protein			Cradle to retail gate	Large water footprint values can be attributed in part to evaporative losses from hydroelectric energy generation.
Geburt et al. (2022)	cow	Organic, non-UHT	Blue WF, protein basis	no	0.23	m3 water/g protein			Cradle to retail gate	Large water footprint values can be attributed in part to evaporative losses from hydroelectric energy generation.
Geburt et al. (2022)	cow	Conventional, UHT	Blue WF, protein basis	no	0.14	m3 water/g protein			Cradle to retail gate	Large water footprint values can be attributed in part to evaporative losses from hydroelectric energy generation.
Geburt et al. (2022)	cow	Organic, UHT	Blue WF, protein basis	no	0.015	m3 water/g protein			Cradle to retail gate	Large water footprint values can be attributed in part to evaporative losses from hydroelectric energy generation.
Geburt et al. (2022)	oat		Blue WF	yes	0.006	m3 water/kg milk			Cradle to retail gate	Large water footprint values can be attributed in part to evaporative losses from hydroelectric energy generation.
Geburt et al. (2022)	oat		Blue WF	no	2.55	m3 water/kg milk			Cradle to retail gate	Large water footprint values can be attributed in part to evaporative losses from hydroelectric energy generation.
Geburt et al. (2022)	oat		Blue WF, protein basis	no	0.43	m3 water/g protein			Cradle to retail gate	Large water footprint values can be attributed in part to evaporative losses from hydroelectric energy generation.
Geburt et al. (2022)	soy	Conventional (Brazil, USA)	Blue WF	yes	0.005	m3 water/kg milk			Cradle to retail gate	Large water footprint values can be attributed in part to evaporative losses from hydroelectric energy generation.
Geburt et al. (2022)	soy	Organic (Switzerland)	Blue WF	yes	0.004	m3 water/kg milk			Cradle to retail gate	Large water footprint values can be attributed in part to evaporative losses from hydroelectric energy generation.
Geburt et al. (2022)	soy	Conventional (Brazil, USA)	Blue WF	no	1.66	m3 water/kg milk			Cradle to retail gate	Large water footprint values can be attributed in part to evaporative losses from hydroelectric energy generation.
Geburt et al. (2022)	soy	Organic (Switzerland)	Blue WF	no	2.22	m3 water/kg milk			Cradle to retail gate	Large water footprint values can be attributed in part to evaporative losses from hydroelectric energy generation.
Geburt et al. (2022)	soy	Conventional (Brazil, USA)	Blue WF, protein basis	no	0.05	m3 water/g protein			Cradle to retail gate	Large water footprint values can be attributed in part to evaporative losses from hydroelectric energy generation.
Geburt et al. (2022)	soy	Organic (Switzerland)	Blue WF, protein basis	no	0.06	m3 water/g protein			Cradle to retail gate	Large water footprint values can be attributed in part to evaporative losses from hydroelectric energy generation.
Poore & Nemecek (2018)	almond	Global estimate	Water withdrawals	no	371.459	L water/L milk			Cradle to processor gate, incl. packaging	Scope goes to retail gate, but retail does not contribute to water use (Fig S1)
Poore & Nemecek (2018)	cow	Global estimate	Water withdrawals	no	628.2	L water/L milk			Cradle to processor gate, incl. packaging	Scope goes to retail gate, but retail does not contribute to water use (Fig S1)
Poore & Nemecek (2018)	oat	Global estimate	Water withdrawals	no	48.24	L water/L milk			Cradle to processor gate, incl. packaging	Scope goes to retail gate, but retail does not contribute to water use (Fig S1)
Poore & Nemecek (2018)	rice	Global estimate	Water withdrawals	no	269.808	L water/L milk			Cradle to processor gate, incl. packaging	Scope goes to retail gate, but retail does not contribute to water use (Fig S1)
Poore & Nemecek (2018)	soy	Global estimate	Water withdrawals	no	27.8	L water/L milk			Cradle to processor gate, incl. packaging	Scope goes to retail gate, but retail does not contribute to water use (Fig S1)
Reinhardt et al. (2020)	cow		Blue WF	yes	2000	L water/kg milk	2061.86	L water/L milk	Cradle to retail gate	Water use is described as "water footprint," we interpreted this as blue water based on use of the AWARE model (Boulay et al., 2018)
Reinhardt et al. (2020)	oat		Blue WF	yes	300	L water/kg milk	309.278	L water/L milk	Cradle to retail gate	Water use is described as "water footprint," we interpreted this as blue water based on use of the AWARE model (Boulay et al., 2018)
Reinhardt et al. (2020)	soy		Blue WF	yes	3000	L water/kg milk	3092.78	L water/L milk	Cradle to retail gate	Water use is described as "water footprint," we interpreted this as blue water based on use of the AWARE model (Boulay et al., 2018)
Winans et al (2020)	almond	2016 estimate	Blue WF	no	183	kg water/1.42 L milk	128.873	L water/L milk	Cradle to processor gate, incl. packaging
Winans et al (2020)	almond	2017 estimate	Blue WF	no	175	kg water/1.42 L milk	123.239	L water/L milk	Cradle to processor gate, incl. packaging
Winans et al (2020)	cow	Weighted global average	Blue WF	no	86	m^3 water/mt milk	88.6598	L water/L milk	Cradle to processor gate, incl. packaging	Cow milk estimate from Mekonnen and Hoekstra (2010), Table 4, added for comparative purposes; based on Ercin et al. (2012), Table 5, the water footprint of packaging is exclusively green and/or grey water, thus we assume packaging would not affect the blue water estimate of cow milk

## Sheet: Table S9
Table S9 Water use associated with dairy and plant milks, averaged by study, milk type, water use type, and use of scarcity weighting
If a given study reported multiple values for the same milk type, water use type, and use of scarcity weighting, here we averaged those values.
study	milk_type	water_use_type	scarcity_weighted	water_use_avg	unit	scope
Buchan et al. (2022)	almond	Total WF	yes	45376.9	L water/L milk	Cradle to processor gate, excl. packaging
Buchan et al. (2022)	coconut	Total WF	yes	366.94	L water/L milk	Cradle to processor gate, excl. packaging
Buchan et al. (2022)	cow	Total WF	yes	41728.8	L water/L milk	Cradle to processor gate, excl. packaging
Buchan et al. (2022)	oat	Total WF	yes	7988.79	L water/L milk	Cradle to processor gate, excl. packaging
Buchan et al. (2022)	pea	Total WF	yes	5935.76	L water/L milk	Cradle to processor gate, excl. packaging
Buchan et al. (2022)	almond	Total WF, protein basis	yes	8205443	L water/L milk	Cradle to processor gate, excl. packaging
Buchan et al. (2022)	coconut	Total WF, protein basis	yes	55991	L water/L milk	Cradle to processor gate, excl. packaging
Buchan et al. (2022)	cow	Total WF, protein basis	yes	1234579	L water/L milk	Cradle to processor gate, excl. packaging
Buchan et al. (2022)	oat	Total WF, protein basis	yes	609103	L water/L milk	Cradle to processor gate, excl. packaging
Buchan et al. (2022)	pea	Total WF, protein basis	yes	73016	L water/L milk	Cradle to processor gate, excl. packaging
Ercin et al (2012)	cow	Blue WF	no	88.6598	L water/L milk	Cradle to processor gate, incl. packaging
Ercin et al (2012)	soy	Blue WF	no	11	L water/L milk	Cradle to processor gate, incl. packaging
Ercin et al (2012)	cow	Total WF	no	1050	L water/L milk	Cradle to processor gate, incl. packaging
Ercin et al (2012)	soy	Total WF	no	296.9	L water/L milk	Cradle to processor gate, incl. packaging
Feraldi et al (2012)	almond	Blue WF	no	66.5714	L water/L milk	Cradle to processor gate, excl. packaging
Feraldi et al (2012)	coconut	Blue WF	no	3.59803	L water/L milk	Cradle to processor gate, excl. packaging
Feraldi et al (2012)	cow	Blue WF	no	88.6598	L water/L milk	Cradle to processor gate, excl. packaging
Feraldi et al (2012)	soy	Blue WF	no	26.8399	L water/L milk	Cradle to processor gate, excl. packaging
Florén et al. (2013), DEU	cow	Blue WF	yes	0.0009	m3 water/L milk	Cradle to packaging end of life
Florén et al. (2013), DEU	oat	Blue WF	yes	0.008	m3 water/L milk	Cradle to packaging end of life
Florén et al. (2013), SWE	cow	Blue WF	yes	0.0009	m3 water/L milk	Cradle to packaging end of life
Florén et al. (2013), SWE	oat	Blue WF	yes	0.00054	m3 water/L milk	Cradle to packaging end of life
Geburt et al. (2022)	almond	Blue WF	no	2.52	m3 water/kg milk	Cradle to retail gate
Geburt et al. (2022)	cow	Blue WF	no	6.255	m3 water/kg milk	Cradle to retail gate
Geburt et al. (2022)	oat	Blue WF	no	2.55	m3 water/kg milk	Cradle to retail gate
Geburt et al. (2022)	soy	Blue WF	no	1.94	m3 water/kg milk	Cradle to retail gate
Geburt et al. (2022)	almond	Blue WF	yes	0.14	m3 water/kg milk	Cradle to retail gate
Geburt et al. (2022)	cow	Blue WF	yes	0.01125	m3 water/kg milk	Cradle to retail gate
Geburt et al. (2022)	oat	Blue WF	yes	0.006	m3 water/kg milk	Cradle to retail gate
Geburt et al. (2022)	soy	Blue WF	yes	0.0045	m3 water/kg milk	Cradle to retail gate
Geburt et al. (2022)	almond	Blue WF, protein basis	no	0.42	m3 water/g protein	Cradle to retail gate
Geburt et al. (2022)	cow	Blue WF, protein basis	no	0.15125	m3 water/g protein	Cradle to retail gate
Geburt et al. (2022)	oat	Blue WF, protein basis	no	0.43	m3 water/g protein	Cradle to retail gate
Geburt et al. (2022)	soy	Blue WF, protein basis	no	0.055	m3 water/g protein	Cradle to retail gate
Poore & Nemecek (2018)	almond	Water withdrawals	no	371.459	L water/L milk	Cradle to processor gate, incl. packaging
Poore & Nemecek (2018)	cow	Water withdrawals	no	628.2	L water/L milk	Cradle to processor gate, incl. packaging
Poore & Nemecek (2018)	oat	Water withdrawals	no	48.24	L water/L milk	Cradle to processor gate, incl. packaging
Poore & Nemecek (2018)	rice	Water withdrawals	no	269.808	L water/L milk	Cradle to processor gate, incl. packaging
Poore & Nemecek (2018)	soy	Water withdrawals	no	27.8	L water/L milk	Cradle to processor gate, incl. packaging
Reinhardt et al. (2020)	cow	Blue WF	yes	2061.86	L water/L milk	Cradle to retail gate
Reinhardt et al. (2020)	oat	Blue WF	yes	309.278	L water/L milk	Cradle to retail gate
Reinhardt et al. (2020)	soy	Blue WF	yes	3092.78	L water/L milk	Cradle to retail gate
Winans et al (2020)	almond	Blue WF	no	126.056	L water/L milk	Cradle to processor gate, incl. packaging
Winans et al (2020)	cow	Blue WF	no	88.6598	L water/L milk	Cradle to processor gate, incl. packaging
